# Supplementary material
Source: PubMed Central journal article supplement (PMC2918277)
Supplement: NIHMS106991-supplement-01.pdf [file NIHMS106991-supplement-01.pdf]

Supplementary Table 1.

PCR primers for amplification of bisulfite-converted HPV16 DNA

| <b>Pair</b> | <b>Forward<br/>Primer<sup>a</sup></b> | <b>Reverse<br/>Primer<sup>a</sup></b> | <b>Product<br/>Length<sup>b</sup></b> |
|-------------|---------------------------------------|---------------------------------------|---------------------------------------|
| 1           | 7835 - 7859                           | 86 - 115                              | 185                                   |
| 2           | 99 - 124                              | 435 - 462                             | 364                                   |
| 3           | 416 - 444                             | 666 - 691                             | 276                                   |
| 4           | 666 - 692                             | 791 - 816                             | 151                                   |
| 5           | 822 - 849                             | 1262 - 1288                           | 467                                   |
| 6           | 1281 - 1310                           | 1568 - 1595                           | 315                                   |
| 7           | 1774 - 1800                           | 2243 - 2272                           | 499                                   |
| 8           | 2624 - 2648                           | 3009 - 3026                           | 403                                   |
| 9           | 3006 - 3035                           | 3372 - 3398                           | 393                                   |
| 10          | 3386 - 3411                           | 3703 - 3725                           | 340                                   |
| 11          | 3719 - 3748                           | 3942 - 3966                           | 248                                   |
| 12          | 3991 - 4015                           | 4278 - 4307                           | 317                                   |
| 13          | 4326 - 4355                           | 4538 - 4563                           | 238                                   |
| 14          | 4804 - 4833                           | 5139 - 5168                           | 365                                   |
| 15          | 5066 - 5095                           | 5420 - 5449                           | 384                                   |
| 16          | 5556 - 5585                           | 5962 - 5986                           | 431                                   |
| 17          | 6329 - 6358                           | 6601 - 6627                           | 299                                   |
| 18          | 6605 - 6632                           | 7048 - 7077                           | 473                                   |
| 19          | 7061 - 7088                           | 7460 - 7484                           | 424                                   |
| 20          | 7465 - 7492                           | 7749 - 7778                           | 314                                   |
| 12-1        | 7893 - 3917                           | 4105 - 4140                           | 248                                   |
| 12-2        | 4133 - 4162                           | 4289 - 4319                           | 187                                   |

<sup>a</sup> Nucleotide number in the HPV16 genome.

<sup>b</sup> Length in base-pairs.

Supplementary Table 2.

HPV16 CpGs with partially missing data

| ORF | CpG <sup>a</sup> | No. of samples<br>with missing data | DNA methylation in samples<br>with complete data |                    |
|-----|------------------|-------------------------------------|--------------------------------------------------|--------------------|
|     |                  |                                     | Frequency <sup>b</sup>                           | Level <sup>c</sup> |
| E1  | 1509             | 1/13                                | 2/12                                             | 6.3 ± 4.5          |
| E1  | 1559             | 1/13                                | 0/12                                             | N/A                |
| E1  | 1566             | 2/13                                | 1/11                                             | 4.5 ± 4.5          |
| E5  | 4016             | 2/13                                | 0/11                                             | N/A                |
| L2  | 4247             | 1/13                                | 3/12                                             | 8.2 ± 4.4          |
| L2  | 4259             | 1/13                                | 0/12                                             | N/A                |
| L2  | 4268             | 5/13                                | 0/8                                              | N/A                |
| L2  | 4275             | 6/13                                | 0/7                                              | N/A                |

<sup>a</sup> Position of the cytosine.

<sup>b</sup> Number of samples with methylation/number of samples with data.

<sup>c</sup> Percent of HPV16 copies with methylated CpG (mean ± S.E.M.).
